# Supplementary material
Source: publisher figshare collection journal article supplement (https://acs.figshare.com/ndownloader/files/4141762)

# An Isostructural Series of Chiral Nine-Coordinate Lanthanide Complexes Based on Triazacyclononane

*James W. Walton, Rachel Carr, Nicholas H. Evans, Alexander M. Funk, Alan M. Kenwright,*

*David Parker\* Dmitry Yufit, Mauro Botta<sup>a</sup>, Sara De Pinto<sup>a</sup> and Ka-Leung Wong<sup>b</sup>*

Department of Chemistry, Durham University, South Road, Durham DH1 3LE, UK.

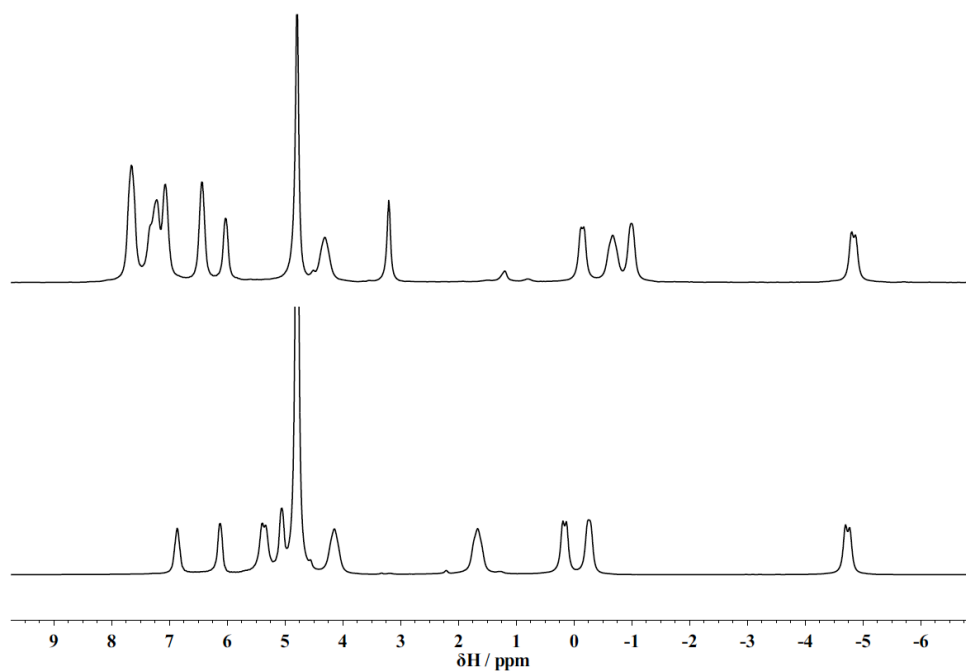

**Figure S1**  $^1\text{H}$  NMR spectra for  $[\text{EuL}^3]$  (upper,  $\text{D}_2\text{O}$ , 4.7T) and  $[\text{EuL}^1]$  (lower,  $\text{CD}_3\text{OD}$ ). See main text for assignments

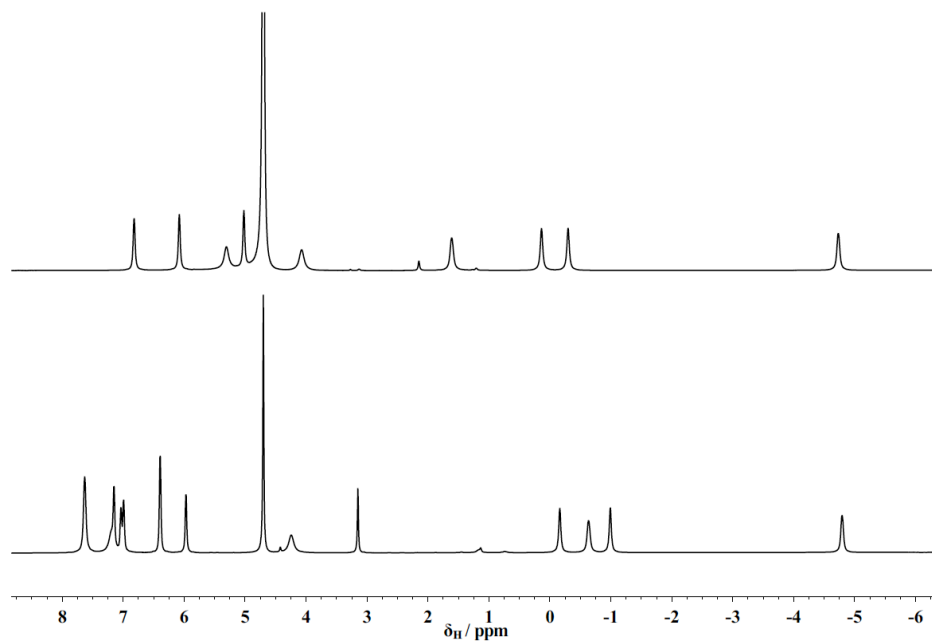

**Figure S2**  $^1\text{H}$  NMR spectra for  $[\text{EuL}^3]$  (upper,  $\text{D}_2\text{O}$ , 16.5T) and  $[\text{EuL}^1]$  (lower,  $\text{CD}_3\text{OD}$ )

**Table S1** Best Fit parameters for the T dependence of NMRD profiles of [GdL<sup>2</sup>]

| <b>“outer sphere” parameters</b>                         |             |             |             |             |
|----------------------------------------------------------|-------------|-------------|-------------|-------------|
|                                                          | <b>10°C</b> | <b>18°C</b> | <b>25°C</b> | <b>37°C</b> |
| $r_{1p}^{20}$ (mM <sup>-1</sup> s <sup>-1</sup> )        | 2.90        | 2.33        | 1.93        | 1.57        |
| $\Delta^2$ (s <sup>-2</sup> ; ×10 <sup>19</sup> )        | 2.75*       | 2.75*       | 2.75±0.07   | 2.75*       |
| $\tau_v$ (ps)                                            | 13±1        | 12±1        | 10±1        | 7.5±0.7     |
| $q^*$                                                    | 0           | 0           | 0           | 0           |
| $a$ (Å)                                                  | 4.3*        | 4.3*        | 4.3±0.1     | 4.3*        |
| $D$ (cm <sup>2</sup> s <sup>-1</sup> ;×10 <sup>5</sup> ) | 1.35±0.02   | 1.74±0.01   | 2.24*       | 3.10±0.02   |

\* fixed during the fit

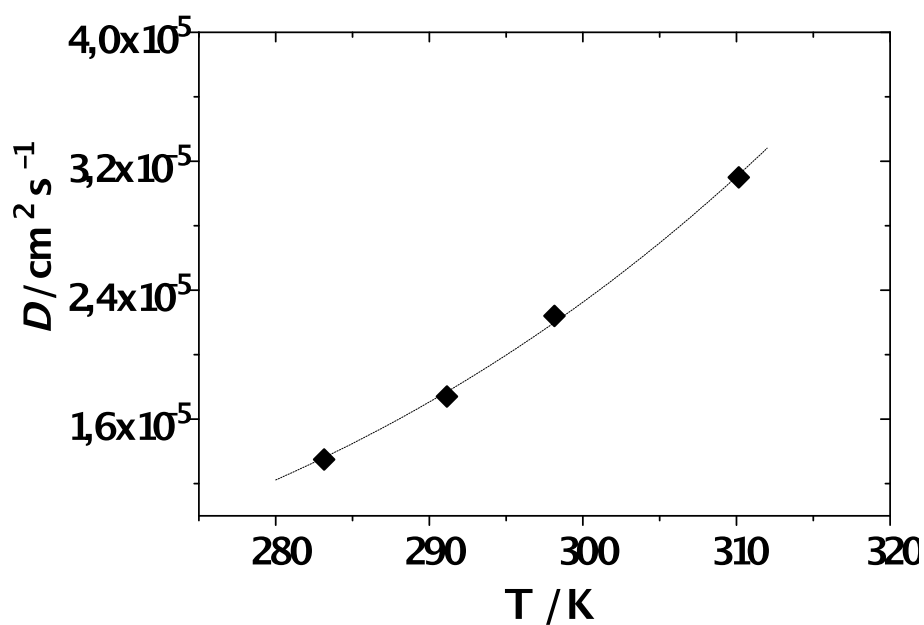

From the fit of the data a  $\Delta H_D^\circ$  value of -24.8 kJ/mol is calculated.

$$(D)^{-1} = \frac{(D_0^{-1})^{98,15}}{298.15} T \exp \left[ \frac{\Delta H_D}{R} \left( \frac{1}{298.15} - \frac{1}{T} \right) \right]$$

**Figure S3** ESR spectrum of [GdL<sup>2</sup>] recorded at 25 °C (0.9 mM solution)

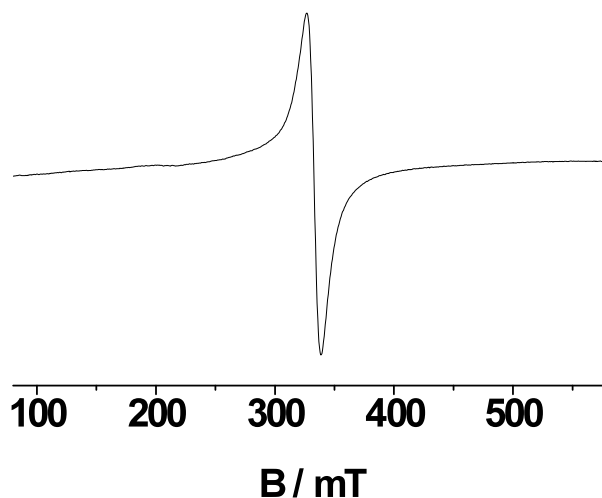

Center field = 0.33 T (14 MHz for <sup>1</sup>H). The experiment was repeated at 4 temperatures and estimated the  $T_{2e}$  values from the bandwidth according to a simplified equation:<sup>a</sup>

$$1/T_{2e} = (g\beta\pi 3^{1/2}/h)\Delta H$$

<sup>a</sup> J. Reuben *The Journal of Physical Chemistry*, **1972**, Vol. **76**, N° **20**, 3164; D. H. Powell, A. Merbach, *Helvetica Chimica Acta*, (76) 2139 – 2146, **1993** (n.b: in this paper there is an error in the equation)

| Temperature (K) | $\Delta H_{pp}$ (mT) | $T_{2e}$ (ps) |
|-----------------|----------------------|---------------|
| 283,75          | 14,18                | 462,34        |
| 290,85          | 13,20                | 497,36        |
| 296,55          | 11,73                | 561,13        |
| 306,85          | 9,78                 | 669,92        |

In comparison, these are correlated data for GdDOTA and GdDTPA, under the same conditions

| GdDOTA          |                      |               |
|-----------------|----------------------|---------------|
| Temperatura (K) | $\Delta H_{pp}$ (mT) | $T_{2e}$ (ps) |
| 283,75          | 8,30                 | 790,99        |
| 296,55          | 8,79                 | 746,05        |
| 306,85          | 9,28                 | 705,94        |

| GdDTPA          |                      |               |
|-----------------|----------------------|---------------|
| Temperatura (K) | $\Delta H_{pp}$ (mT) | $T_{2e}$ (ps) |
| 283,75          | 64,02                | 102,55        |
| 296,55          | 63,54                | 103,34        |
| 306,85          | 63,54                | 103,34        |

The ESR bandwidths of [GdDOTA] and [GdL2] are similar, confirming their similar electronic relaxation times (in the former this has in the past often been interpreted as a result of high symmetry and rigidity)

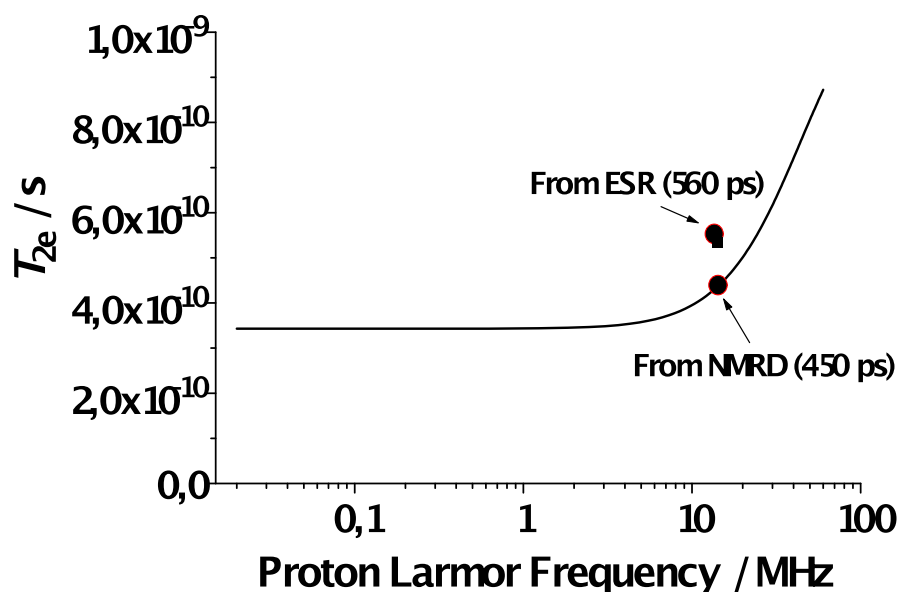

**Figure S4** A simulation of the field dependence of  $T_{2e}$  according to SBM theory, (Morgan equation) using the best-fit parameters from the reported NMRD data. The agreement is good considering the approximations of the equations for each technique.

Morgan equation for  $T_{2e}$  in a form suitable for Gd(III):

$$\left( \frac{1}{T_{2e}} \right) = \Delta^2 \tau_v \left[ \frac{5.26}{1 + 0.372 \omega_S^2 \tau_v^2} + \frac{7.18}{1 + 1.24 \omega_S \tau_v} \right]$$

**Figure S5** CPL and total emission spectra for  $\Delta$  (blue) and  $\Lambda$  (red)-[EuL<sup>1</sup>].  
(The scale used in each CPL figure refers to  $(I_L - I_R)$  and is on a scale of x42 with respect to  $(I_L + I_R)$ .)

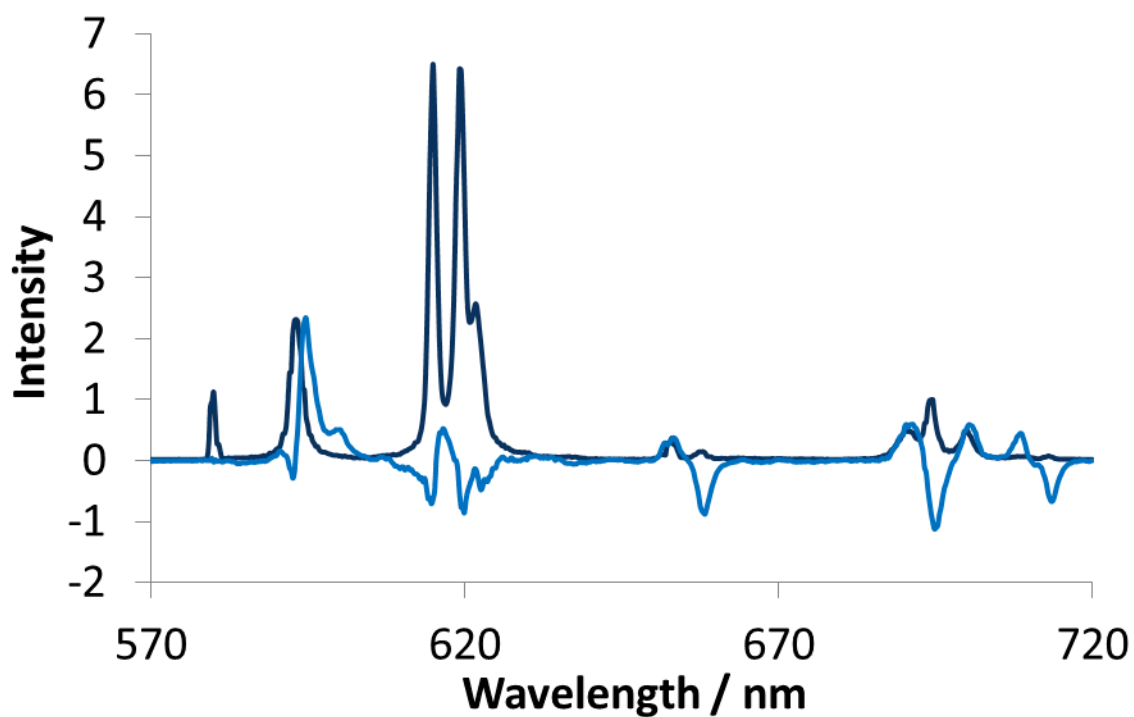

= E1 =  $\Lambda$

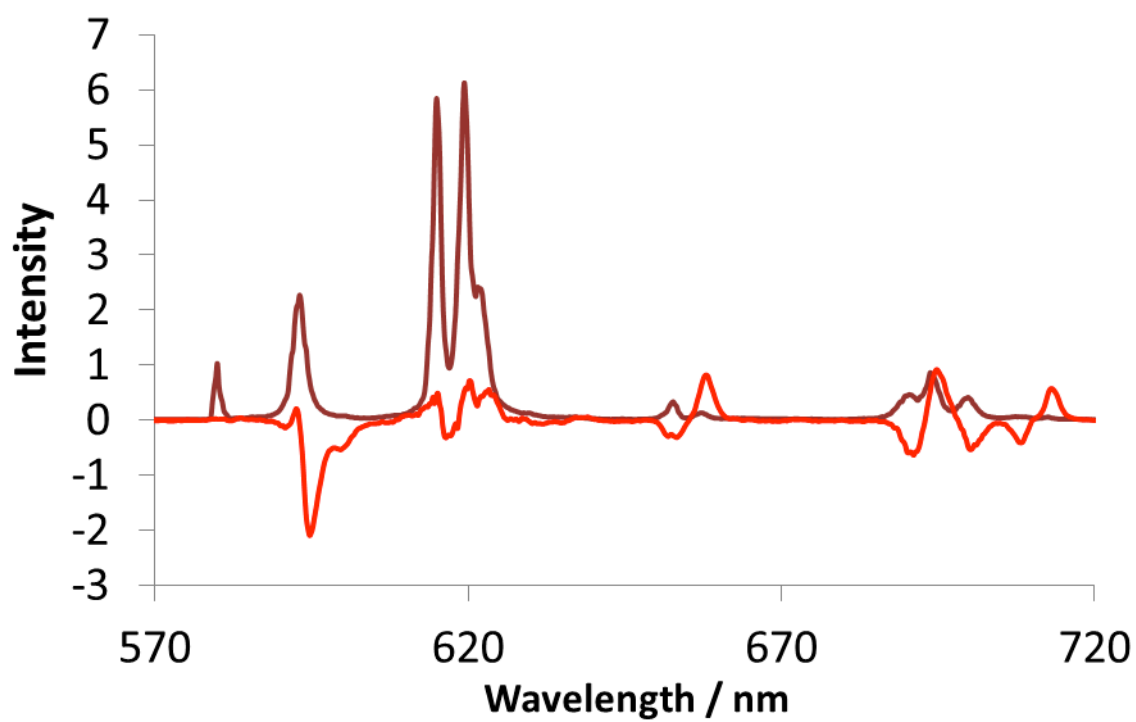

**Figure S6** Emission spectra for [EuL<sup>1</sup>] at 298 and 77K in MeOH ( $\lambda_{\text{exc}}$  365 nm)

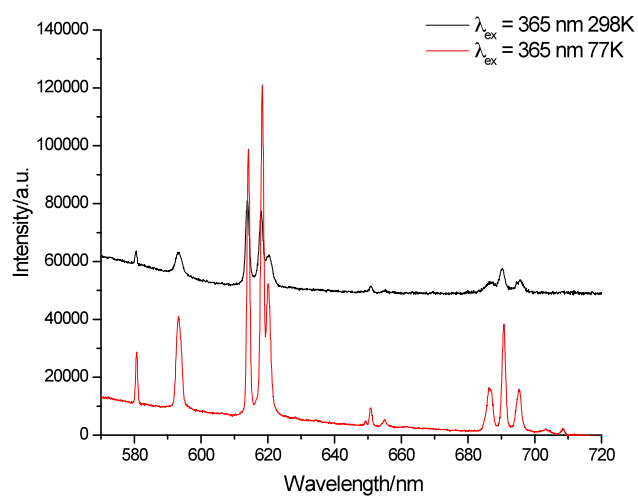

**Figure S7** Variable temperature <sup>1</sup>H NMR spectra for [YbL<sup>1</sup>] (CD<sub>3</sub>OD, 500MHz)

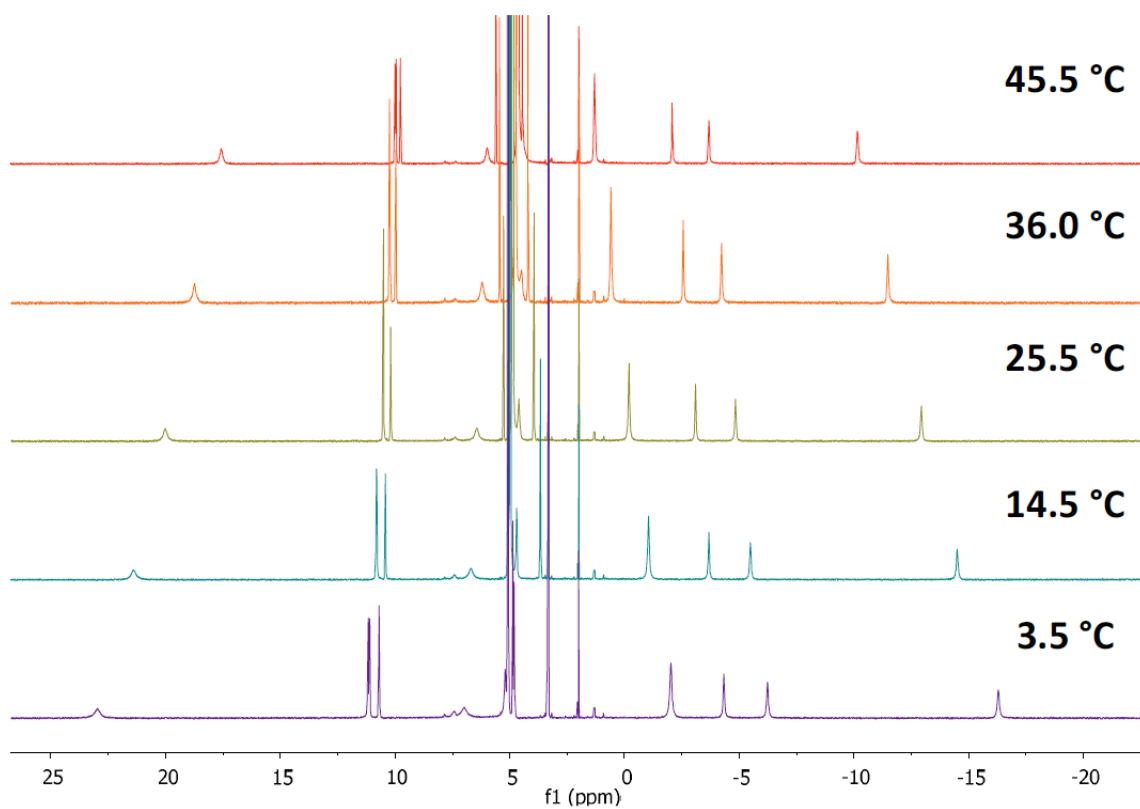

**Figure S9** Eu emission spectra for (*upper*) [EuL<sup>1</sup>] and (*lower*) [EuL<sup>3</sup>] ( $\lambda_{\text{exc}}$  272 nm, H<sub>2</sub>O, A = 0.1, 295K) showing the increase in the  $\Delta J = 2$  (ca 620 nm) :  $\Delta J = 1$  (ca 593 nm) ratio for [EuL<sup>3</sup>], (6.4 vs 5.2). (Increment 0.1 nm, integration time 0.5 s, excitation slits 2.5 nm, emission slits 1 nm)

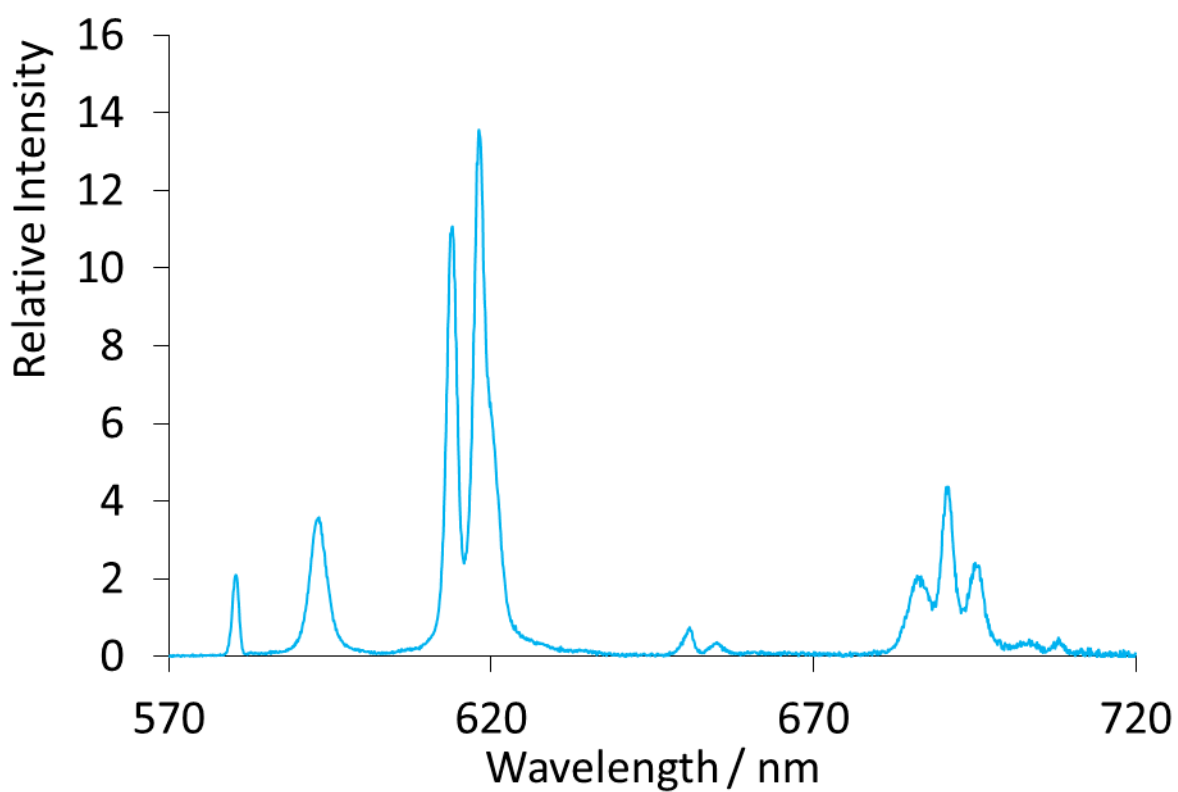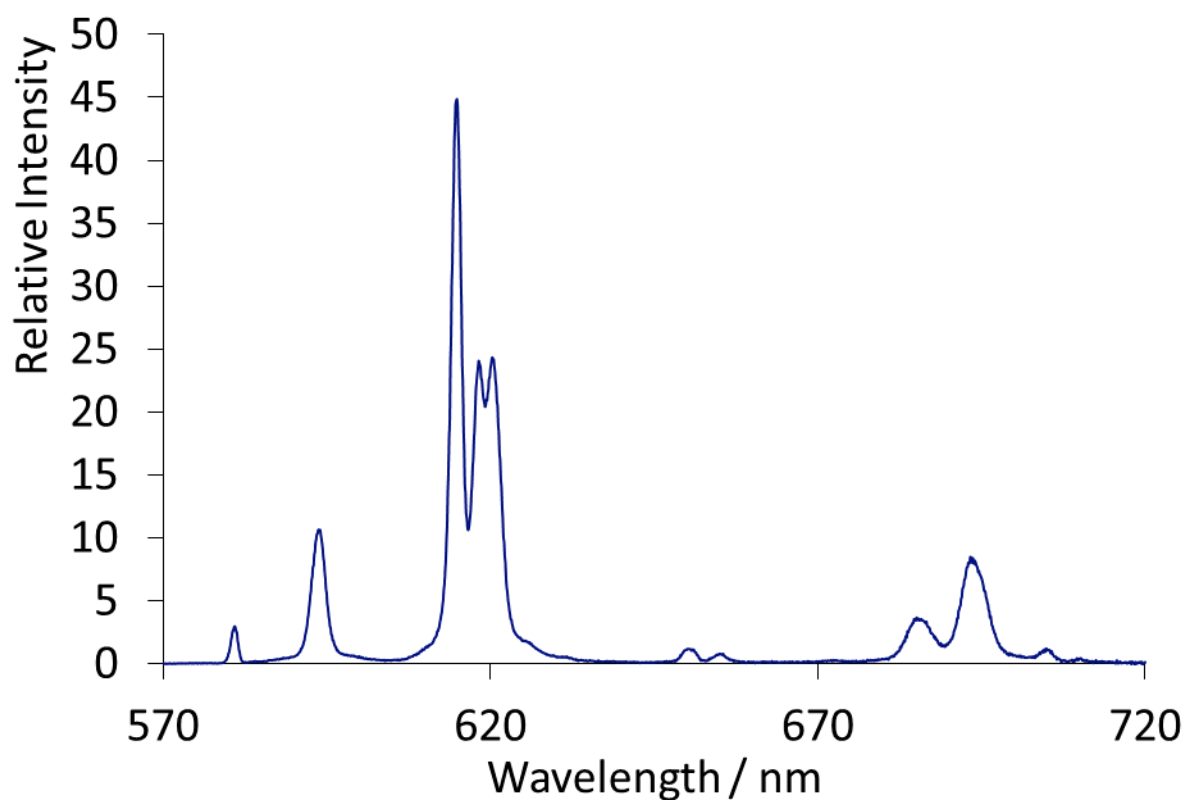

Supplement: Supplementary file 1 [file 4141762]
